# Supplementary material for: Identifying Links Between Productivity and Biobehavioral Rhythms Modeled From Multimodal Sensor Streams: Exploratory Quantitative Study
Source: JMIR AI. 2024 Apr 18;3:e47194. doi: 10.2196/47194 (PMC11066747; doi:10.2196/47194)
Supplement: Multimedia Appendix 1 [file ai_v3i1e47194_app1.docx]

Let denote the set of sensor features that are present for rhythm parameter in time window , denote the subset of with ( represents the level of statistical significance and typically , here ) for rhythm parameter in time window . Let denote the set of rhythm parameters that are present for sensor feature in time window , denote the set of whose 𝑝 < 𝑡ℎ𝑟𝑒𝑠ℎ𝑜𝑙𝑑 𝑡 for sensor feature in time window .

For each sensor feature , we first transform the sample correlation to Fisher’s 𝑧 score by Equation 2.

, where represents the significant Pearson correlation coefficient between rhythm parameter and productivity in time window for sensor feature with the index of . represent the set of all rhythm parameters with significant correlation.

Then, we calculate the aggregated correlations and significance between productivity and rhythm parameters () within each time window (e.g., week 1) using Equation 3 and 4.

These aggregated correlations and significance are denoted as and , which are then averaged across time windows with Equation 5 and 6.

, where 𝐽 represents the total number of time windows.

In the end, the aggregated 𝑧 score () is transformed into the format of correlation coefficients by Equation 7. The final average correlations and significance are denoted as and respectively.
